# Supplementary material for: Determination of volatility of ionic liquids at the nanoscale by means of ultra-fast scanning calorimetry
Source: Royal Society of Chemistry journal article supplement (doi:10.1039/c3cp54325k), 2013-11-15
Supplement: c3cp54325k.pdf [file c3cp54325k.pdf]

**Title:** Bubble formation at 900 K

**Video legend:** Bubble formation in a small droplet of [EMIm][NTf<sub>2</sub>] on a chip-sensor at a substrate temperature of 900 K. The time is slowed down for better viewing.

**Keywords:** [EMIm][NTf<sub>2</sub>], droplet, fast heating, differential fast scanning calorimetry, ionic liquid
